# Supplementary material for: Human leukocyte antigen-DQA1*04:01 and rs2040406 variants are associated with elevated risk of childhood Burkitt lymphoma
Source: PubMed Central journal article supplement (PMC10770398; doi:10.1038/s42003-023-05701-5), 2024-01-05
Supplement: 42003_2023_5701_MOESM3_ESM.pdf [file 42003_2023_5701_MOESM3_ESM.pdf]

## **Description of Additional Supplementary Files**

**File name:** Supplementary Data 1

**Description:** The source data behind the graphs in Figure 2.
